# Supplementary material for: Structural Characterization and Biogenic Chitosan-ZnO Nanocomposites via Bauhinia purpurea Leaf Extract: and its their Therapeutic Evaluation
Source: Research Square preprint supplement (doi:10.21203/rs.3.rs-7036243/v1), 2025-07-10
Supplement: Supplementary file 1 [file e1a7d61c336eaa4104526a3b.docx]

| **S.no** | **Peak Position (cm⁻¹)** | **Vibrational Mode** | **Functional Group** |
| --- | --- | --- | --- |
|  | 3279.3 | O–H stretching | Alcohols, phenols |
|  | 2922.7 | C–H stretching | Alkanes |
|  | 1562.1 | C=C or N–H bending | Aromatic ring / Amides |
|  | 1316.8 | P=O or C–N stretching | Phosphates / Amines |
|  | 1152.5 | C–O–C stretching | Ethers / Polysaccharides (chitosan) |
|  | 1018.4 | C–O stretching | Alcohols / Ethers |
|  | 823.7 | Zn–O stretching | Zinc oxide nanoparticles |
|  | 656.8 | Zn–O bending/stretching | Zinc oxide nanoparticles |
|  | 611.27 | Zn–O bending/stretching | Zinc oxide nanoparticles |

**Table 1** FTIR peak assignments indicating functional groups present in the *B. purpurea* leaf extract-based chitosan-ZnO nanocomposite.
